# Supplementary material
Source: PubMed Central journal article supplement (PMC3307268)

## Supplementary Experimental Procedures

Identification of a Hypochlorite-Specific Transcription Factor from *Escherichia coli*

**Katharina M. Gebendorfer, Adrian Drazic, Yan Le, Jasmin Gundlach, Alexander Bepperling, Andreas Kastenmüller, Kristina A. Ganzinger, Nathalie Braun, Titus M. Franzmann, and Jeannette Winter**

### SUPPLEMENTAL EXPERIMENTAL PROCEDURES

*Generation of strains and expression plasmids*—All strains used in this study are listed in Table S1. The expression plasmid pJC2 for the production of C-terminal His<sub>6</sub>-tagged YjiE (YjiE-His) was obtained by cloning the PCR-amplified *yjiE* gene (using the primer Fw *yjiE* and Rv C-term His-Tag *yjiE*; primer sequences are given in Table S2) via *NdeI/BamHI* into pET11a. The expression plasmid pKMG20 for the production of YjiE with thrombin-cleavable N-terminal His<sub>6</sub>-tag (His-T-YjiE) was generated using the primer Fw *yjiE* and Rv *yjiE* and cloning the *NdeI/BamHI*-digested PCR fragment into pET28a. For the production of C-terminally flash-tagged YjiE (YjiE-flash), the expression plasmids pAD1 and pAD2 were generated using the primer Fw *yjiE* and Rv *yjiE*-flash and cloning the *NdeI/HindIII*-digested or *NdeI/BamHI*-digested PCR fragment into pJW2 (pAD1) or into pET28a (pAD2). Strains JC15, KMG89, and AD3 were obtained by transforming BL21(DE3) gold cells with pJC2, pKMG20, or pAD2, respectively. Plasmid pKMG09 was generated by cloning the PCR-amplified *yjiE* gene into pJW2 (Winter et al., 2005) using the primer Fw *yjiE* and Rv *yjiE*. The *yjiE* deletion in C600 (KMG214) was generated according to Datsenko and Wanner (2000) (Datsenko and Wanner, 2000) using the primer Fw del *yjiE* and Rv del *yjiE*. KMG214 was transformed with pKMG09 to generate KMG229 and with pAD1 to yield AD2. The correct sequence of all generated plasmids was verified by DNA sequencing.

*Transcription profiles*—Strains C600 (WT, *yjiE*<sup>+</sup>) and KMG214 (*yjiE*<sup>-</sup>) at an OD<sub>600</sub> of 0.5 were treated with HOCl (2 mM final concentration, 5 min). HOCl was quenched by the addition of 5-fold concentrated LB medium, cells harvested, and the cell pellet frozen in liquid nitrogen and stored at -80°C. The isolation of RNA and gene expression analyses was performed at MFT Services (Tübingen, Germany) as follows. Total RNA isolation was performed via phenol extraction and RNeasy Midi Kit (Qiagen) according to the manufacturer's instructions. Biotinylated cDNA was prepared after fragmentation according to the standard Affymetrix protocol from 3 µg total RNA (Prokaryotic Sample and Array Processing, Technical Manual 701030 Rev. 5, 2004, Affymetrix). 3 µg of cDNA were hybridized for 16 hours at 50° C on the *E. coli* Genome 2.0 GeneChip array. GeneChips were washed and stained in the Affymetrix Fluidics Station 450 and then scanned using the Affymetrix GeneChip Scanner 3000 7G. A probe level summary was determined using the Affymetrix™ GeneChip Operating Software using the MAS5 algorithm. Normalization of raw data was performed by the Array Assist™ Software 10.0 (Agilent), applying a GC-RMA (Robust Multichip Average) algorithm. Transcripts with a minimum change in expression level of 2-fold in at least two of the three replicates were considered significantly up- or down-regulated. Gene information and function were obtained from EcoCyc.

*Sucrose gradient centrifugation*— Sucrose gradients were generated by successively layering 750 µl of 0 %, 10 %, 20 %, 30 %, 40 %, and 50 % sucrose (in 10 mM NaH<sub>2</sub>PO<sub>4</sub> pH7.5, 150 mM NaCl) in 5 ml centrifuge tubes (Beckman) and allowed to equilibrate at 4°C for 24 h. Gradients were overlaid with *in vivo* FLAsH-labeled lysates, centrifuged (78,000 g, 4°C for 16 h, Optima MAX-E ultracentrifuge with MLS50 rotor (Beckman Coulter)), fractionated, and fractions separated by SDS-PAGE. YjiE-flash\*-containing fractions were visualized by fluorescence (Typhoon Imager 9200 (GE)). Other proteins were

visualized by Coomassie stain or identified by Western blot using specific antibodies produced in rabbit (GroES, DnaK, GroEL) or mass spectrometry as described before (Rudolph et al., 2010). Based on the known oligomerization state of the identified proteins (according to [www.ecocyc.org](http://www.ecocyc.org)), the molecular weight of YjiE-flash was estimated. The identified proteins and their apparent molecular weight were GroES (73 kDa, heptamer), DnaK (69kDa, monomer), TktA (144 kDa, dimer), GapA (142 kDa, tetramer), PurL (141 kDa, monomer), RNA polymerase core enzyme (378 kDa, heteroeramer [RpoA]<sub>2</sub> [RpoB] [RpoC]), GroEL (803 kDa, 14-mer), and SucB (1056 kDa, 24-mer).

*Calculation of the YjiE-DNA-complex stoichiometry*—50 nM AF488-labeled 158 bp *yjiE* DNA was titrated with YjiE concentrations ranging from 0.5-3  $\mu$ M and mixtures were subjected to sedimentation velocity aUC analysis. The data sets were fitted using the 2DSA/GA-MC method, the “continuous c(S) with bimodal f/f0” model of SEDFIT and the “hybrid global continuous distribution and global discrete species” model of SEDPHAT to obtain the hydrodynamic parameters for the protein-DNA-complex. The fits returned S-values of 8.72 to 8.77 and a f/f0 of 1.29 to 1.33 yielding a buoyant mass of 34.8 kDa. The buoyant mass (Mb) is linked to the molecular mass (M) by equation (1),

$$M_b = M (1 - \bar{v} \rho) \quad (1)$$

where  $\bar{v}$  denotes the partial specific volume of the solute and  $\rho$  the density of the solvent (SEDNTERP). Using  $\bar{v}_{YjiE} = 0.73$  and  $\bar{v}_{DNA} = 0.55$ , we calculated the  $\bar{v}_{complex}$  for a variety of complexes consisting of 2-6 molecules YjiE (35 kDa) having one molecule of DNA (52 kDa) bound. Only the YjiE-Dimer-DNA complex with a  $\bar{v}_{complex} = 0.6533$  matched the experimentally determined buoyant mass.

*Generation of single-copy *yjiE::lacZ* reporter fusions and determination of  $\beta$ -Galactosidase activity*—To construct the translational *yjiE::lacZ* reporter fusion, a PCR fragment starting at 304 bp upstream and ending 22 bp downstream of the translational start site of *yjiE* (thus containing the putative *yjiE* promoter region) was generated using chromosomal MG1655 DNA as template and the primer pair Z12-Fw304yjiE22 and Z13-Rv304yjiE22, which contain a *Bam*HI and *Hind*III restriction site, respectively. The fragment was cloned into pJL28 (Lucht *et al.*, 1994). The reporter fusion was transferred to the att( $\lambda$ ) location of the chromosome of JG39 (C600 *lacZ::Kan*) and JG59 (C600 *lacZ::Kan yjiE::Cm*) via phage  $\lambda$ RS74 (Simons *et al.*, 1987). Single lysogeny was tested by a PCR approach (Powell *et al.*, 1994).  $\beta$ -galactosidase activity was assayed by the use of o-nitrophenyl- $\beta$ -D-galactopyranoside as substrate and is reported as micromoles of o-nitrophenol per minute per milligram of cellular protein (Miller, 1972). Experiments were performed in triplicates and data are presented as mean  $\pm$  SD.

*Circular dichroism measurements*—Far-UV CD-Spectra were recorded using a Jasco-J-715 spectrometer. YjiE (ca. 14  $\mu$ M) was either left untreated or incubated with a 5-fold molar excess of HOCl for 30 min at 25°C. Afterwards, HOCl was quenched by the addition of methionine. CD-Spectra were recorded between 195 und 260 nm with 0.1 mg/ml YjiE at 20°C with 20 nm/min. 16 spectra were accumulated. Melting curves were generated at 222 nm between 20°C and 80°C at a heating rate of 20°C/h.

*3D-Reconstructions of YjiE oligomers*—As mainly top-views of YjiE oligomers have been observed, due to preferential adsorption on the carbon support film, the 3D-structures have been approximated by projecting the 2D class averages of the top-views in horizontal direction. The height of the projection was chosen such that the volume of the 3D-reconstructions was in full agreement with the oligomeric masses.

*Hydrodynamic simulations*—Sedimentation coefficients of YjiE oligomers were estimated by hydrodynamic simulations conducted within the software package HYDROMIC (García de la Torre *et al.*, 2001) using the above 3D reconstructions as input.

## SUPPLEMENTAL REFERENCE LIST

- Datsenko, K. A. and Wanner, B. L. (2000) Proc. Natl. Acad. Sci. USA 97, 6640-6645
- García de la Torre, J., Llorca, O., Carrascosa, J. L., and Valpuesta, J. M. (2001) Eur. Biophys. J. 30, 457-462
- Lucht, J. M. , Dersch, P. , Kempf, B., and Bremer, E. (1994) J. Biol. Chem. 269, 6578–6586
- McHugh, J. P., Rodriguez-Quinones, F., Abdul-Tehrani, H., Svistunencko, D. A., Poole, R. K., Cooper, C. E., and Andrews, S. C. (2003) J. Biol. Chem. 278, 29478-29486
- Miller, J. H. (1972) Experiments in Molecular Genetics. Cold Spring Harbor, NY: Cold Spring Harbor Laboratory
- Powell, B. S. , Court, D. L. , Nakamura, Y. , Rivas, M. P., and Turnbough, C. L. Jr. (1994) Nucleic Acids Res. 22, 5765–5766
- Rudolph, B., Gebendorfer, K. M., Buchner, J., and Winter, J. (2010). J. Biol. Chem. 285, 19029-19034
- Simons, R. W., Houman, F., and Kleckner, N. (1987) Gene 53, 85–96
- Winter, J., Linke, K., Jatzek, A., and Jakob, U. (2005). Mol. Cell 17, 381-392

**Supplementary Figure 1.** A. Surface representations of reconstructed 3D-structures of YjiE. Given are the corresponding oligomeric masses and sedimentation coefficients, as obtained by hydrodynamic simulations (20°C, viscosity  $\eta=0.012\text{P}$ ). B. YjiE-flash is specifically FAsH-labeled in lysates. Sedimentation velocity analysis of 6  $\mu\text{M}$  lysates that either expressed (black line) or did not express *yjiE-flash* (gray line). Lysates were labeled with FAsH after cell lysis. Please note that the lysate lacking *yjiE-flash* expression showed no significant fluorescence. C. Lysates containing YjiE-flash that was FAsH-labeled prior to cell lysis were analyzed by sucrose gradient centrifugation. YjiE-flash\* was visualized using a fluorescence scanner and only the YjiE-flash\* containing portion of the gel is shown (Inset). Gradient fractions are numbered and indicated. According to the known oligomerization state and molecular weight of the identified proteins in the fractions (see methods), the molecular weight of the YjiE oligomer was calculated to 140–380 kDa. The circles represent the molecular weight of the identified proteins and the line represents the regression line. D. Competition of AF488-labeled *yjiE* DNA with unlabeled *yjiE* DNA monitored by FA. Fluorescence of 10 nM AF488 DNA alone (1), after addition of 1  $\mu\text{M}$  YjiE (2) and after addition of 100 nM unlabeled DNA (3). Samples were analyzed at 20°C.

**Supplementary Figure 2.** Translational fusions of the putative *yjiE* promoter region with *lacZ*. JG140 (C600  $\Delta lacZ$ ; wild-type) and JG141 (C600  $\Delta lacZ \Delta yjiE$ ) cells were grown at 37°C in LB medium and were left untreated or supplemented with HOCl as indicated during exponential growth phase. Aliquots were removed after 15 min and *yjiE* expression was analyzed by determining  $\beta$ -galactosidase activity of the *yjiE::lacZ* reporter fusion.

**Supplementary Figure 3.** A. Far-UV-CD-Spectra of purified, untreated YjiE (filled circles) and YjiE treated with a 5-fold molar excess of HOCl (open circles). Spectra were measured with 0.1 mg/ml YjiE in YjiE storage buffer at 20°C. 16 spectra were accumulated. B. Melting curves of YjiE (black line) and YjiE treated with a 5-fold molar excess of HOCl (gray line) at 222 nm measured between 20°C and 80°C with a heating rate of 20°C/h. C. Typical TEM class average of YjiE treated with a 10-fold molar excess of HOCl and negatively stained with uranyl acetate (scale bar: 10 nm). D. Sedimentation velocity analysis of 12  $\mu\text{M}$  YjiE-HOCl in storage buffer. During sedimentation the absorbance at 280 nm was monitored.

**Gebendorfer et al., Table S1.** Strains used in this study.

| <b>strain name</b> | <b>relevant genotype, plasmid</b>                                                 | <b>source / reference</b>   |
|--------------------|-----------------------------------------------------------------------------------|-----------------------------|
| C600               | <i>thr leu thi lac4 rpsL supE</i> (F <sup>-</sup> )                               | <i>E. coli</i> stock center |
| BL21(DE3) gold     | F <sup>-</sup> <i>ompT hsdS(rB- mB-) dcm<sup>+</sup> Tatr gal λ(DE3) endA Hte</i> | Stratagene                  |
| JC15               | BL21 (DE3) gold pJC2                                                              | This study                  |
| KMG89              | BL21 (DE3) gold pKMG20                                                            | This study                  |
| KMG214             | C600 <i>yjiE::Cm</i>                                                              | This study                  |
| KMG229             | KMG214 pKMG09                                                                     | This study                  |
| AD2                | KMG214 pAD1                                                                       | This study                  |
| AD3                | KMG39 pAD2                                                                        | This study                  |
| JG39               | C600 <i>lacZ::Kan</i>                                                             | This study                  |
| JG59               | C600 <i>lacZ::Kan yjiE::Cm</i>                                                    | This study                  |
| JG140              | JG39 <i>yjiE::lacZ</i>                                                            | This study                  |
| JG141              | JG59 <i>yjiE::lacZ</i>                                                            | This study                  |

**Gebendorfer et al., Table S2. Primer used in this study.**

| <b>Primer name</b>            | <b>Sequence (5' to 3')</b>                             |
|-------------------------------|--------------------------------------------------------|
| Fw <i>yjiE</i>                | ggaattccatatggatgactgtggtgcgattttg                     |
| Rv C-term His-Tag <i>yjiE</i> | cccaagcttggatcctcagtgatggatggatggctaaagcacaatctccagctc |
| Rv <i>yjiE</i>                | cccaagcttggatcctcagtaagcacaatctccagctc                 |
| Rv <i>yjiE</i> -flash         | cccaagctttcaacagcagccccggacagcagtaagcacaatctccagctc    |
| Fw del <i>yjiE</i>            | gacagagtaaaacgtaatggatgactgtggtgtgtaggctggagctgcttc    |
| Rv del <i>yjiE</i>            | cgacgctggagaatgtagcagtaagcacaatcatatgaatatcctccttag    |
| Fw -106bp <i>yjiE</i>         | gacggcaaagcctgcgtgaa                                   |
| Rv +52 bp <i>yjiE</i>         | cataaagccatttggttcaat                                  |
| Fw -106 bp <i>metN</i>        | attgatttagacgtctggatgccttaac                           |
| Rv +52 bp <i>metN</i>         | tggtgctgggtgccctgg                                     |
| Fw -106 bp <i>cydA</i>        | tcacatggtatgatgaaagtgttcaaac                           |
| Rv +52 bp <i>cydA</i>         | tcgcggtcaaggcaaactgtaag                                |
| TufB3-Fw                      | gtctaaagaaaagttgaacgtacaaaaccg                         |
| TufB301-Rv                    | cgtccatctgcgcagcaccgggtgatc                            |
| YjiE3-Fw                      | ggatgactgtggtgcgattttgcataatattg                       |
| YjiE301-Rv                    | gttgcgcgtaatcgctgccgccacg                              |
| MetN3-Fw                      | gataaaactttcgaatatcaccaaaagtgttcc                      |
| MetN301-Rv                    | caaaaacagtacgcgaagagagcagg                             |
| CysH3-Fw                      | gtccaaactcgatctaaacgcctgaac                            |
| CysH301-Rv                    | ggttgagcttgagttgtccgtaactg                             |
| MetB5-Fw                      | cgcgtaaacaggccaccatgcagtg                              |
| MetB303-Rv                    | gtagcagtcgtgcggcgcaaccagc                              |
| fecD3-Fw                      | gaaaattgcgctggttatttcatcacc                            |
| fecD301-Rv                    | gtagagccccacagaggccaggc                                |
| Z12-Fw304yjiE22               | cgggatccgaaaccgtgcaggtgctggtc                          |
| Z13-Rv304yjiE22               | cccaagcttgcaaaatcgaccacagtcac                          |

**Gebendorfer et al., Table S3. Up-regulated genes – Microarray analysis of *yjiE*<sup>+</sup> and *yjiE*<sup>-</sup> cells upon HOCl stress.** Given are genes that are up-regulated more than two-fold in one or both strains in response to HOCl (ratio >2 in *yjiE*<sup>+</sup> cells and <2 in *yjiE*<sup>-</sup> cells and *vice versa*, ratio between both strains >2). Gene information and function were obtained from EcoCyc. Footnote denotes members of the <sup>1</sup>Fur regulon (McHugh et al., 2003).

| Gene        | Function                                         | pathway             | x-fold change in:        |                          |
|-------------|--------------------------------------------------|---------------------|--------------------------|--------------------------|
|             |                                                  |                     | <i>yjiE</i> <sup>+</sup> | <i>yjiE</i> <sup>-</sup> |
| <i>acpD</i> | azoreductase                                     | metabolism          | 106                      | 415                      |
| <i>alr</i>  | alanine racemase 1                               | metabolism          | 0.9                      | 2.1                      |
| <i>alx</i>  | putative transport protein                       | transport           | 1.1                      | 2.4                      |
| <i>avtA</i> | valine--pyruvate transaminase                    | metabolism          | 1.7                      | 3.5                      |
| <i>bhsA</i> | hypothetical protein                             | unknown             | 102                      | 293                      |
| <i>clpA</i> | Clp protease ATP-binding subunit                 | protein homeostasis | 1.6                      | 5.6                      |
| <i>clpP</i> | Clp protease proteolytic subunit                 | protein homeostasis | 1.8                      | 5.6                      |
| <i>cysH</i> | 3'-phospho-adenylylsulfate reductase             | metabolism          | 6.4                      | 1.8                      |
| <i>cysK</i> | cysteine synthase A                              | metabolism          | 32                       | 123                      |
| <i>cysN</i> | sulfate adenylyltransferase, subunit 1           | metabolism          | 10                       | 27                       |
| <i>cysP</i> | thiosulfate transporter subunit                  | metabolism          | 107                      | 232                      |
| <i>cysU</i> | sulfate/thiosulfate transporter subunit          | metabolism          | 7.8                      | 27                       |
| <i>cysW</i> | sulfate/thiosulfate transporter permease subunit | metabolism          | 6.6                      | 13                       |
| <i>dadX</i> | alanine racemase 2, PLP-binding                  | metabolism          | 6.0                      | 13                       |
| <i>erpA</i> | essential respiratory protein A                  | metabolism          | 1.3                      | 3.5                      |
| <i>fumC</i> | fumarate hydratase                               | metabolism          | 1.7                      | 4.0                      |
| <i>glpE</i> | thiosulfate sulfurtransferase                    | metabolism          | 5.5                      | 11                       |
| <i>glpG</i> | intramembrane serine protease                    | protein homeostasis | 1.3                      | 3.7                      |
| <i>glpQ</i> | glycerophosphodiester phosphodiesterase          | metabolism          | 1.6                      | 3.4                      |
| <i>hemF</i> | coproporphyrinogen III oxidase                   | metabolism          | 1.0                      | 2.8                      |
| <i>hemH</i> | ferrochelatase                                   | metabolism          | 4.3                      | 21                       |
| <i>iaaA</i> | L-asparaginase                                   | metabolism          | 2.3                      | 5.9                      |
| <i>ibpB</i> | heat shock chaperone                             | protein homeostasis | 3.2                      | 10                       |
| <i>ileS</i> | isoleucyl-tRNA synthetase                        | metabolism          | 1.0                      | 2.5                      |
| <i>ilvE</i> | branched-chain amino acid aminotransferase       | metabolism          | 2.3                      | 18                       |
| <i>ilvM</i> | acetolactate synthase 2 regulatory subunit       | metabolism          | 15                       | 37                       |
| <i>inaA</i> | pH-inducible protein involved in stress response | stress              | 1.5                      | 3.0                      |
| <i>iscS</i> | cysteine desulfurase                             | metabolism          | 4.0                      | 6.2                      |
| <i>ivbL</i> | putative glutamine synthetase                    | metabolism          | 1.2                      | 5.9                      |
| <i>kefF</i> | regulator of KefC-mediated potassium transport   | metabolism          | 3.9                      | 17                       |
| <i>leuA</i> | 2-isopropylmalate synthase                       | metabolism          | 4.8                      | 18                       |
| <i>lldD</i> | L-lactate dehydrogenase                          | metabolism          | 1.4                      | 4.0                      |
| <i>lptG</i> | conserved inner membrane protein                 | unknown             | 0.8                      | 2.3                      |
| <i>marR</i> | DNA-binding transcriptional repressor            | regulation          | 133                      | 325                      |
| <i>metB</i> | O-succinylhomoserine lyase                       | metabolism          | 3.4                      | 0.9                      |
| <i>metK</i> | methionine adenosyltransferase                   | metabolism          | 2.8                      | 1.5                      |
| <i>metN</i> | comp. of methionine uptake ABC permease          | metabolism          | 6.7                      | 1.2                      |
| <i>nemA</i> | N-ethylmaleimide reductase                       | metabolism          | 10                       | 40                       |
| <i>oxyS</i> | ncRNA                                            | stress              | 6.1                      | 21                       |
| <i>panD</i> | aspartate alpha-decarboxylase                    | metabolism          | 1.7                      | 3.6                      |
| <i>pheL</i> | pheA gene leader peptide                         | metabolism          | 1.1                      | 4.2                      |
| <i>proB</i> | gamma-glutamyl kinase                            | metabolism          | 1.8                      | 3.8                      |
| <i>puuD</i> | gamma-Glu-GABA hydrolase                         | metabolism          | 1.1                      | 3.7                      |

|                          |                                                 |             |     |      |
|--------------------------|-------------------------------------------------|-------------|-----|------|
| <i>qorB</i>              | putative oxidoreductase                         | unknown     | 28  | 56   |
| <i>recA</i>              | recombinase A                                   | DNA related | 0.7 | 2.6  |
| <i>rlmE</i>              | 23S rRNA methyltransferase                      | RNA related | 1.9 | 4.1  |
| <i>sbp</i>               | sulfate transporter subunit                     | metabolism  | 45  | 320  |
| <i>sdhC</i>              | succinate dehydrogenase cytochrome b556 subunit | metabolism  | 4.2 | 12   |
| <i>sufA</i> <sup>1</sup> | Fe-S transport protein in Fe-S cluster assembly | metabolism  | 1.5 | 3.3  |
| <i>tatD</i>              | DNase                                           | DNA related | 1.6 | 3.9  |
| <i>thrL</i>              | thr operon leader peptide                       | metabolism  | 1.5 | 5.2  |
| <i>tnaC</i>              | tna operon leader peptide                       | metabolism  | 2.2 | 1.1  |
| <i>trxA</i>              | thioredoxin 1                                   | metabolism  | 0.6 | 2.0  |
| <i>trxC</i>              | thioredoxin 2                                   | metabolism  | 69  | 143  |
| <i>xthA</i>              | exonuclease III                                 | DNA related | 1.1 | 3.7  |
| <i>yaaA</i>              | conserved protein                               | unknown     | 1.8 | 15   |
| <i>ybeZ</i>              | putative ATP-binding protein                    | unknown     | 1.4 | 3.5  |
| <i>yceA</i>              | conserved protein                               | unknown     | 1.4 | 3.2  |
| <i>yebA</i>              | predicted peptidase                             | unknown     | 2.6 | 6.5  |
| <i>yedY</i>              | reductase                                       | metabolism  | 6.5 | 2.2  |
| <i>yeeD</i>              | conserved protein                               | unknown     | 40  | 92   |
| <i>yeeE</i>              | putative transport system permease protein      | unknown     | 93  | 327  |
| <i>yhaK</i>              | predicted pirin-related protein                 | unknown     | 92  | 261  |
| <i>yheL</i>              | sulfur transfer complex subunit TusB            | metabolism  | 1.5 | 2.3  |
| <i>yhhL</i>              | conserved inner membrane protein                | unknown     | 1.0 | 2.2  |
| <i>yhhW</i>              | hypothetical protein                            | unknown     | 191 | 451  |
| <i>yhiI</i>              | predicted HlyD family secretion protein         | unknown     | 0.8 | 3.1  |
| <i>yijE</i>              | predicted permease                              | unknown     | 1.1 | 11   |
| <i>yjeI</i>              | conserved protein                               | unknown     | 2.0 | 5.0  |
| <i>yjfO</i>              | conserved protein                               | stress      | 2.2 | 1.2  |
| <i>yjgH</i>              | predicted mRNA endoribonuclease                 | unknown     | 125 | 255  |
| <i>ykgA</i>              | predicted DNA-binding transcriptional regulator | unknown     | 2.3 | 1.0  |
| <i>ypfH</i>              | predicted hydrolase                             | unknown     | 11  | 27   |
| <i>yqjF</i>              | predicted quinol oxidase subunit                | unknown     | 221 | 1255 |

**Gebendorfer et al., Table S4. Down-regulated genes – Microarray analysis of *yjiE*<sup>+</sup> and *yjiE*<sup>-</sup> cells upon HOCl stress.** Given are in response to HOCl down-regulated genes (ratio >2 in *yjiE*<sup>+</sup> cells and <2 in *yjiE*<sup>-</sup> cells and *vice versa*, ratio between both strains >2). Footnote denotes members of the <sup>1</sup>Fur regulon (McHugh et al., 2003). Expression changes of less than 2-fold are shown with gray backgrounds and were included because the corresponding genes are part of an operon where some members show more than 2-fold changes.

| Gene                     | Function                                          | pathway        | x-fold change in:        |                          |
|--------------------------|---------------------------------------------------|----------------|--------------------------|--------------------------|
|                          |                                                   |                | <i>yjiE</i> <sup>+</sup> | <i>yjiE</i> <sup>-</sup> |
| <i>adhE</i>              | alcohol dehydrogenase                             | metabolism     | 25                       | 10                       |
| <i>cydA</i>              | cytochrome bd-I terminal oxidase subunit I        | metabolism     | 39                       | 13                       |
| <i>cydB</i>              | cytochrome d terminal oxidase subunit II          | metabolism     | 19                       | 9.8                      |
| <i>entC</i> <sup>1</sup> | isochorismate synthase I                          | Fe acquisition | 8.4                      | 2.7                      |
| <i>entH</i> <sup>1</sup> | thioesterase in enterobactin biosynthesis         | Fe acquisition | 4.4                      | 2.1                      |
| <i>fabB</i>              | β-ketoacyl-ACP synthases I                        | metabolism     | 3.1                      | 1.3                      |
| <i>fecA</i> <sup>1</sup> | ferric citrate outer membrane transporter         | Fe acquisition | 4.4                      | 2.3                      |
| <i>fecB</i> <sup>1</sup> | iron-dicitrate transporter subunit                | Fe acquisition | 5.4                      | 2.8                      |
| <i>fecC</i> <sup>1</sup> | comp. of iron dicitrate ABC transporter           | Fe acquisition | 5.2                      | 2.4                      |
| <i>fecD</i> <sup>1</sup> | comp. of iron dicitrate ABC transporter           | Fe acquisition | 5.3                      | 1.3                      |
| <i>fecE</i> <sup>1</sup> | comp. of iron dicitrate ABC transporter           | Fe acquisition | 2.8                      | 1.4                      |
| <i>fecR</i> <sup>1</sup> | regulator for <i>fec</i> operon                   | Fe acquisition | 11                       | 5.0                      |
| <i>fepC</i> <sup>1</sup> | iron-enterobactin transporter ATP-binding protein | Fe acquisition | 3.5                      | 2.2                      |
| <i>fepD</i> <sup>1</sup> | iron-enterobactin transporter membrane protein    | Fe acquisition | 4.1                      | 2.4                      |
| <i>flgG</i>              | flagellar basal-body rod protein                  | motility       | 4.4                      | 2.0                      |
| <i>fmt</i>               | methionyl-tRNA formyltransferase                  | translation    | 2.0                      | 0.5                      |
| <i>fruA</i>              | comp. of fructose PTS transporter                 | transport      | 7.2                      | 2.6                      |
| <i>infA</i>              | protein chain initiation factor IF-1              | translation    | 10                       | 4.4                      |
| <i>ispA</i>              | geranyl / farnesyl diphosphate synthase           | metabolism     | 2.7                      | 0.6                      |
| <i>ksgA</i>              | 16S rRNA dimethyltransferase                      | RNA related    | 4.1                      | 1.8                      |
| <i>lolA</i>              | periplasmic lipoprotein chaperone                 | metabolism     | 2.5                      | 1.0                      |
| <i>lpxK</i>              | tetraacyldisaccharide 4'-kinase                   | metabolism     | 3.0                      | 1.0                      |
| <i>manY</i>              | comp. of mannose PTS permease                     | transport      | 2.7                      | 1.3                      |
| <i>manZ</i>              | comp. of mannose PTS permease                     | transport      | 2.4                      | 0.8                      |
| <i>mdtD</i>              | transporter                                       | transport      | 1.1                      | 2.9                      |
| <i>oppB</i> <sup>1</sup> | comp. of murein tripeptide ABC transporter        | transport      | 3.8                      | 1.8                      |
| <i>oppD</i> <sup>1</sup> | comp. of murein tripeptide ABC transporter        | transport      | 5.5                      | 2.2                      |
| <i>pdxA</i>              | 4-hydroxy-L-threonine phosphate dehydrogenase     | metabolism     | 5.5                      | 2.6                      |
| <i>pflB</i>              | pyruvate formate-lyase                            | metabolism     | 4.2                      | 1.6                      |
| <i>potC</i>              | comp. of putrescine ABC transporter               | transport      | 2.7                      | 1.2                      |
| <i>proP</i>              | proline/glycine betaine transporter               | transport      | 6.9                      | 2.4                      |
| <i>proV</i>              | comp. of proline ABC transporter                  | transport      | 9.4                      | 3.2                      |
| <i>proW</i>              | comp. of proline ABC transporter                  | transport      | 4.5                      | 2.3                      |
| <i>purA</i>              | adenylosuccinate synthetase                       | metabolism     | 4.1                      | 1.9                      |
| <i>rne</i>               | ribonuclease E                                    | RNA related    | 4.8                      | 1.8                      |
| <i>rnpA</i>              | RNase P protein comp.                             | RNA related    | 5.1                      | 2.0                      |
| <i>rseP</i>              | zinc protease                                     | proteolysis    | 2.1                      | 1.0                      |
| <i>rsmB</i>              | 16S rRNA methyltransferase                        | RNA related    | 2.1                      | 0.7                      |
| <i>rttR</i>              | small RNA                                         | regulation     | 33                       | 12                       |
| <i>ryhB</i> <sup>1</sup> | small RNA involved in iron homeostasis            | Fe homeostasis | 10                       | 2.4                      |
| <i>thyA</i>              | thymidylate synthase                              | metabolism     | 2.4                      | 1.2                      |
| <i>tonB</i> <sup>1</sup> | uptake of iron                                    | Fe acquisition | 3.6                      | 2.0                      |



|                          |                                                    |                |     |     |
|--------------------------|----------------------------------------------------|----------------|-----|-----|
| <i>truB</i>              | tRNA pseudouridine 55 synthase                     | RNA related    | 3.7 | 1.2 |
| <i>ybgT</i>              | small membrane protein                             | unknown        | 4.5 | 2.0 |
| <i>yceD</i>              | conserved protein                                  | unknown        | 2.6 | 1.2 |
| <i>yicC</i>              | predicted protein                                  | unknown        | 2.5 | 1.1 |
| <i>yigZ</i>              | predicted elongation factor                        | unknown        | 2.2 | 1.0 |
| <i>yncE</i> <sup>1</sup> | conserved protein; probable role in Fe acquisition | Fe acquisition | 4.3 | 2.1 |

A

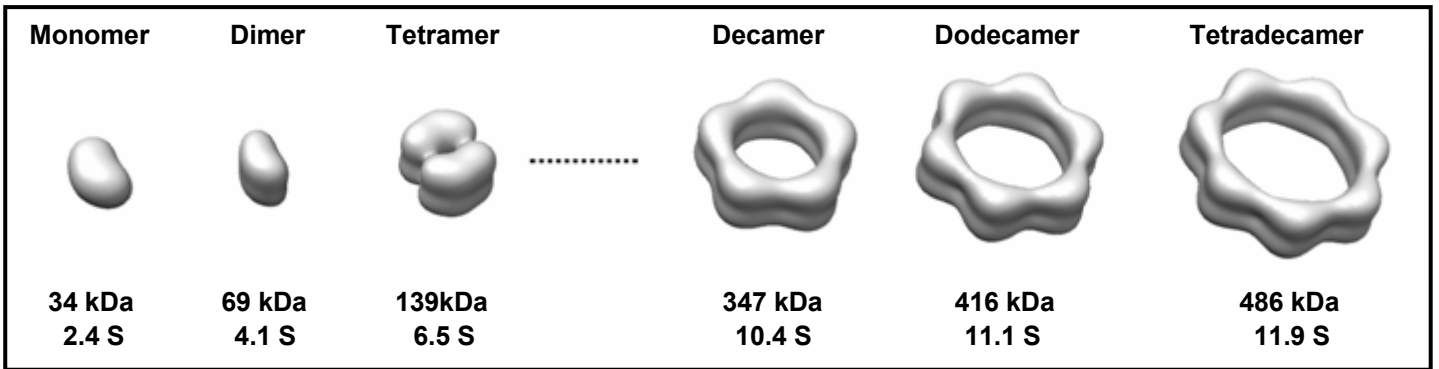

B

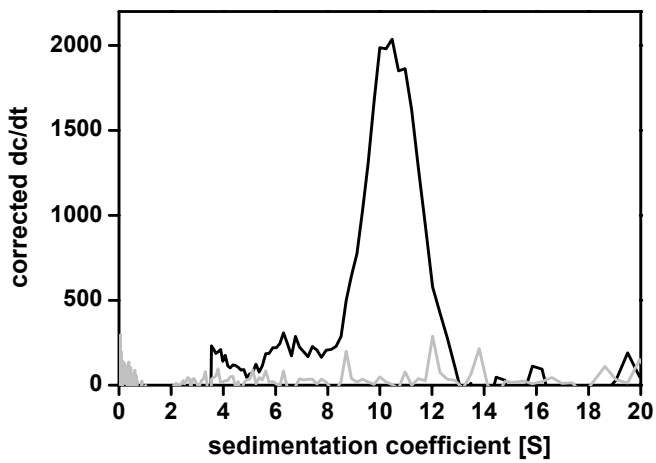

C

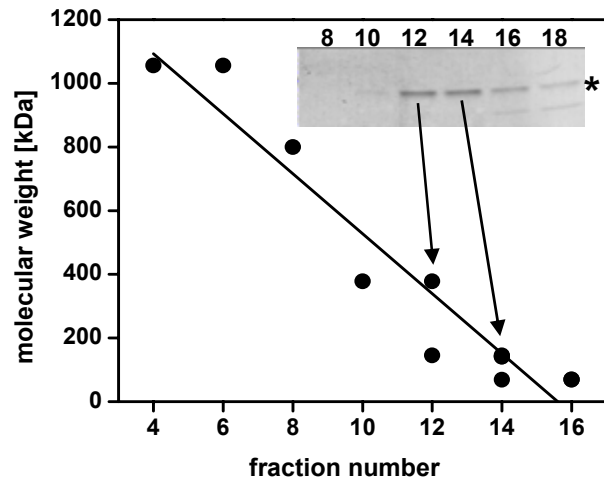

D

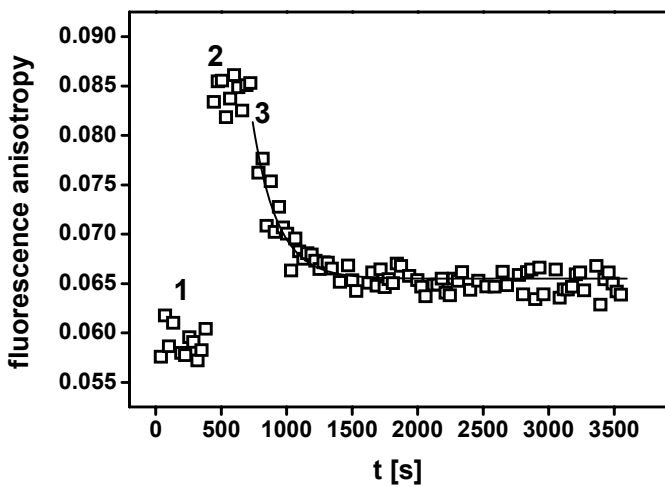

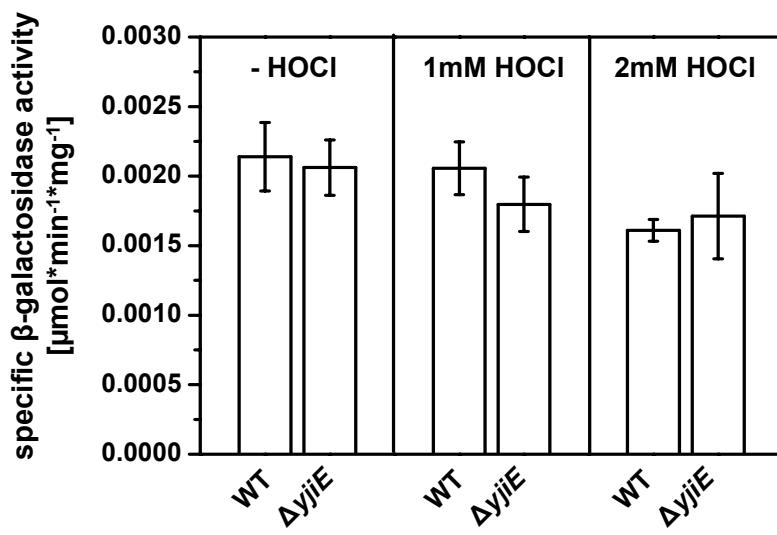

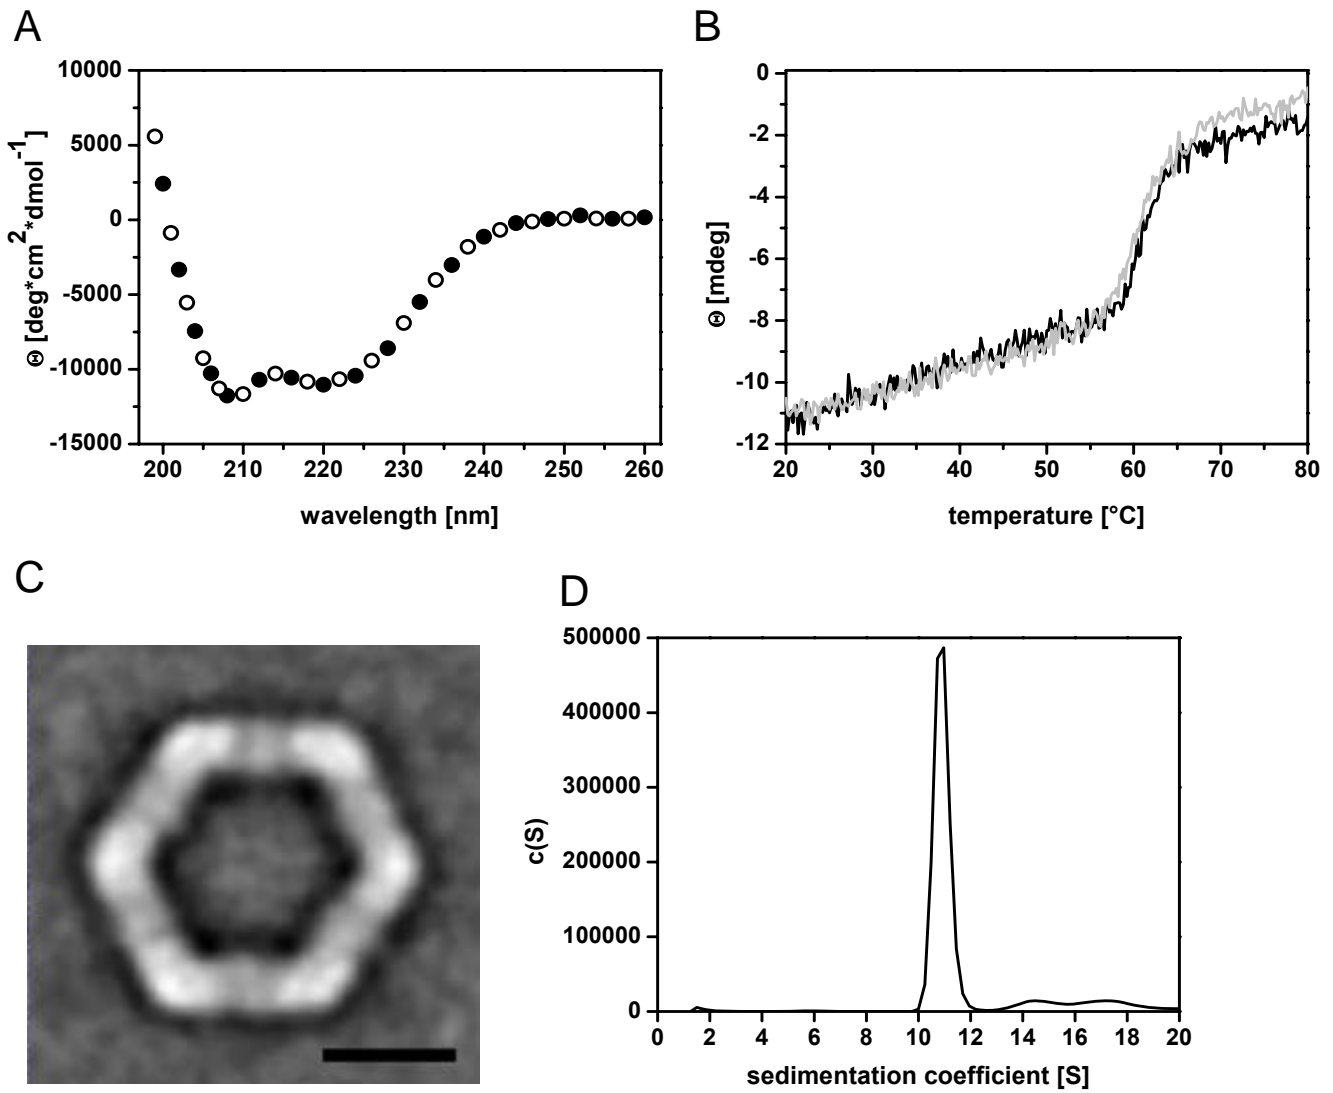

Supplement: supp_M111.287219_jbc.M111.287219-1.pdf [file supp_M111.287219_jbc.M111.287219-1.pdf]
